# Supplementary material for: Novel PROTAC probes targeting KDM3 degradation to eliminate colorectal cancer stem cells through inhibition of Wnt/β-catenin signaling
Source: Royal Society of Chemistry journal article supplement (doi:10.1039/d4md00122b), 2024-01-01

## Supplementary Information

### Novel PROTAC Probes Targeting KDM3 Degradation to Eliminate Colorectal Cancer Stem Cells through Inhibition of Wnt/ $\beta$ -catenin Signaling

Shadid U. Zaman<sup>1†</sup>, Piyusha P. Pagare<sup>1†</sup>, Hongguang Ma<sup>1</sup>, Rosalie G. Hoyle<sup>1</sup>, Yan  
Zhang<sup>1\*</sup>, Jiong Li<sup>1,2, 3\*</sup>

1. Department of Medicinal Chemistry, School of Pharmacy, Virginia Commonwealth  
University, Richmond, Virginia 23298-0540, United States

2. Department of Oral and Craniofacial Molecular Biology, Virginia Commonwealth  
University, Richmond, Virginia 23298-0540, United States

3. Massey Cancer Center, Virginia Commonwealth University, Richmond, Virginia  
23298-0540, United States

† These authors contributed equally

#### \*Corresponding Authors:

Jiong Li, Ph.D.

Department of Medicinal Chemistry, School of Pharmacy, Virginia Commonwealth  
University, Richmond, Virginia 23298-0540, United States

Email: [jli29@vcu.edu](mailto:jli29@vcu.edu)

Yang Zhang, Ph.D.

Department of Medicinal Chemistry, School of Pharmacy, Virginia Commonwealth  
University, Richmond, Virginia 23298-0540, United States

Email: [yzhang2@vcu.edu](mailto:yzhang2@vcu.edu)

## Table of Contents

|                            |         |
|----------------------------|---------|
| Supplementary Table 1..... | S3-S4   |
| Supplementary Figures..... | S5-S9   |
| NMR Spectra.....           | S10-S16 |
| HPLC Chromatograms.....    | S17-S21 |

**Table S1.** The primers used for RT-qPCR.

| Primer Name | Directions | Sequence                   |
|-------------|------------|----------------------------|
| GAPDH       | Forward    | TCATTGACCTCAACTACATG       |
|             | Reversed   | TCGCTCCTGGAAGATGGTGAT      |
| AXIN2       | Forward    | CTGGCTTTGGTGAAGTGTG        |
|             | Reversed   | AGTTGCTCACAGCCAAGACA       |
| CCND1       | Forward    | CAATGACCCCGCACGATTTTC      |
|             | Reversed   | CATGGAGGGCGGATTGGAA        |
| DKK1        | Forward    | TGCGTCACGCTATGTGCTG        |
|             | Reversed   | CCATCCAAGGTGCTATGATC       |
| ASCL2       | Forward    | GGCACCAACACTTGGAGATT       |
|             | Reversed   | CCAGGTCAAGGGTTCTTTGT       |
| RNF43       | Forward    | CATCAGCATCGTCAAGCTGGA      |
|             | Reversed   | TTACCCCAGATCAACACCACT      |
| ZNRF3       | Forward    | TCCGACTGTGCCATCTGTCTGGAGAA |
|             | Reversed   | CCCTTTTGTCTATGATGTTGTGCCG  |
| LGR5        | Forward    | CACCTCCTACCTAGACCTCAG      |
|             | Reversed   | CGCAAGACGTAACCTCCTCCAG     |
| KDM3A       | Forward    | ACCTGCAGTTATTCTTCAGC       |
|             | Reversed   | TAATGCCAGTCCTATGCCAT       |
| KDM3B       | Forward    | TGTTCCCTGGGGACTCCTCT       |
|             | Reversed   | GGGCACTACAGTACAGCTGG       |
| KDM4A       | Forward    | CCTCACTGCGCTGTCTGTAT       |

|       |          |                         |
|-------|----------|-------------------------|
|       | Reversed | CCAGTCGAAGTGAAGCACAT    |
| KDM4B | Forward  | ACTTCAACAAATACGTGGCCTAC |
|       | Reversed | CGATGTCATCATACGTCTGCC   |
| KDM4C | Forward  | GATGAATGGAACATAGCTCGCC  |
|       | Reversed | GGTGTGCCATGCAAACGTG     |

**Figure S1**

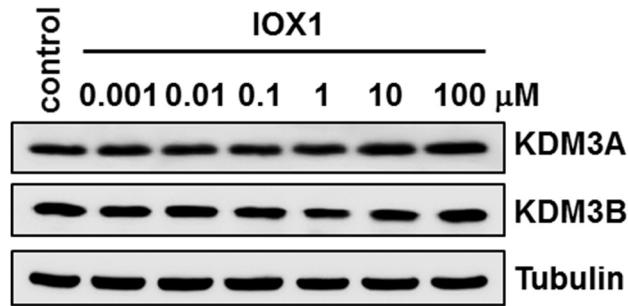

**Figure S1.** IOX1 could not induce KDM3A and KDM3B degradation in SW490 cells. SW480 cell were treated with IOX1 as indicated for 16 hours.

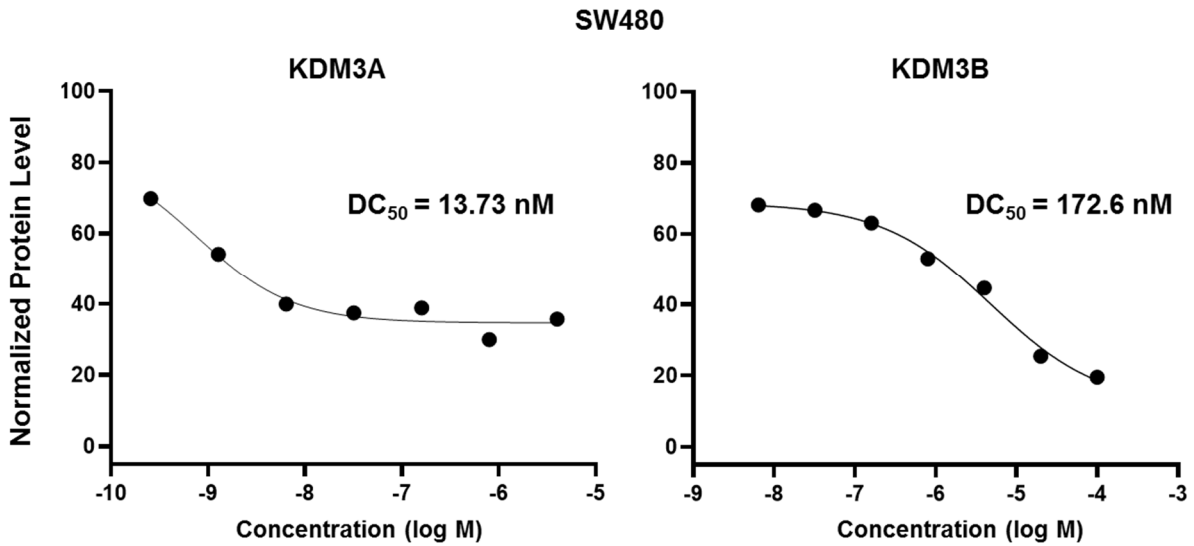

**Figure S2.** Examination of dose-dependent KDM3A or KDM3B degradation by compound 4 in SW480 cells. SW480 cells were treated with compounds 4 as indicated for 16 hours.

**Figure S3**

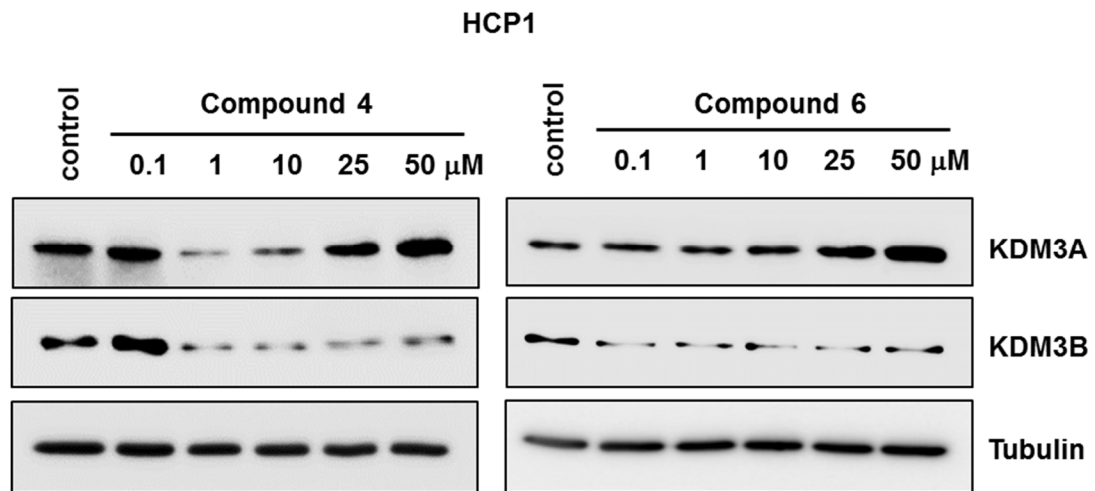

**Figure S3. IOX1-PROTACs induced KDM3A and KDM3B degradation in HCP-1 cells.** HCP-1 cells were treated with compounds 4 or 6 as indicated for 16 hours.

**Figure S4**

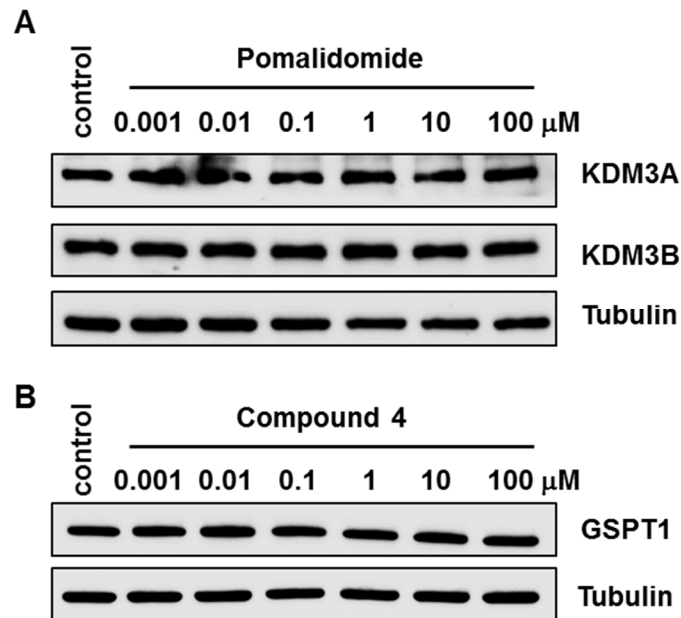

**Figure S4.** (A) Pomalidomide did not induce KDM3A and KDM3B degradation in SW480 cells. SW480 cells were treated with various concentration of pamalidomide as indicated for 16 hours. (B) Compound 4 did not induce GSPT1 degradation in SW480 cells. SW480 cells were treated with various concentration of compound 4 as indicated for 16 hours.

Figure S5

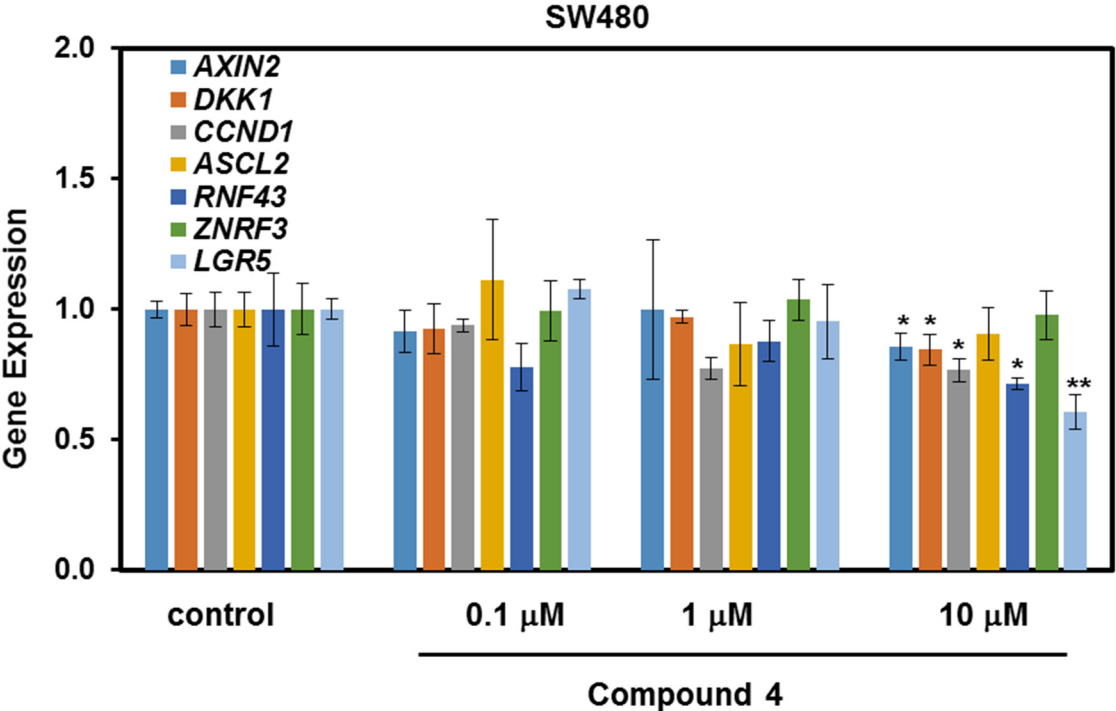

Figure S5. SW480 cells were treated with compounds 4 as indicated for 16 hours. Data represent mean $\pm$ SD. \* $P$ <0.05; \*\* $P$ <0.01; unpaired two-tailed Student's  $t$ -Test.



**Figure S6**

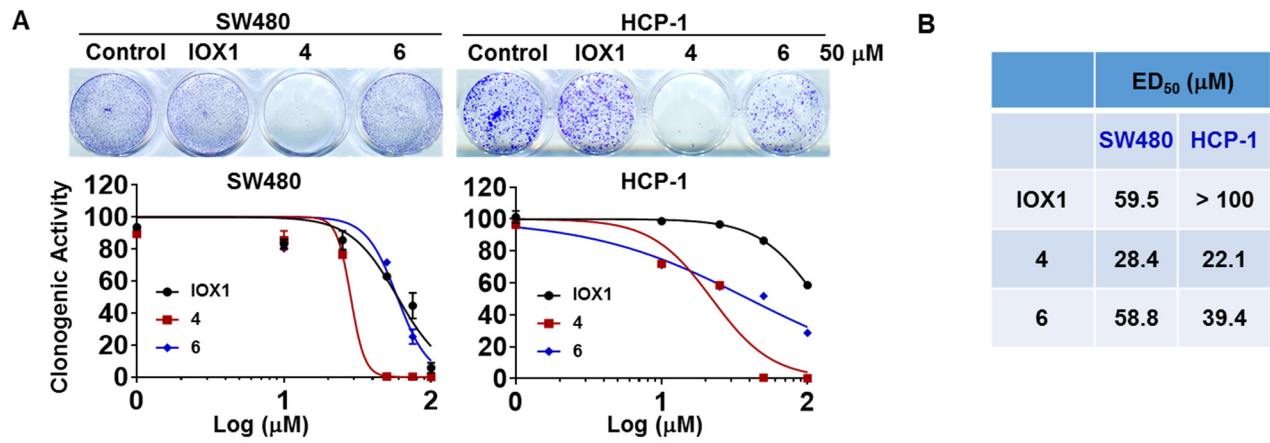

**Figure S6. IOX1-PROTACs suppresses cacogenic ability of CRC cells.** (A). IOX1-PROTACs inhibited colony formation of SW480 and HCP-1 cells. (B) ED<sub>50</sub> values of clonogenic assays.

# <sup>1</sup>H and <sup>13</sup>C NMR spectra of final compounds

*N*-(2-(2-((2-(2,6-dioxopiperidin-3-yl)-1,3-dioxoisindolin-4-yl)amino)ethoxy)ethyl)-8-hydroxyquinoline-5-carboxamide (**1**)

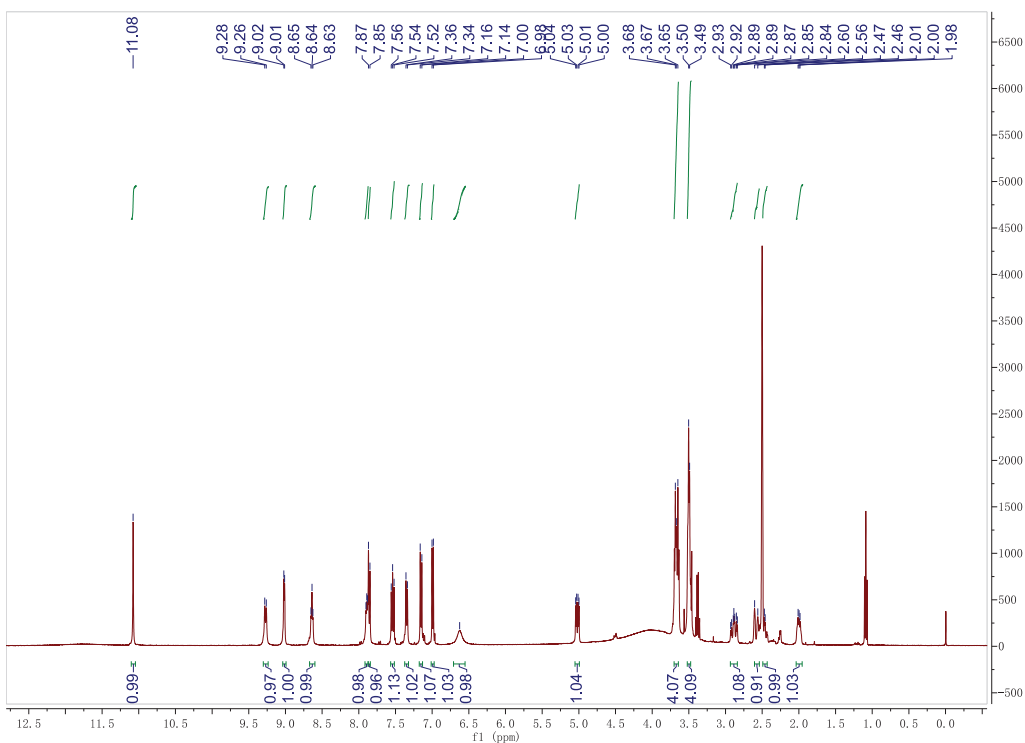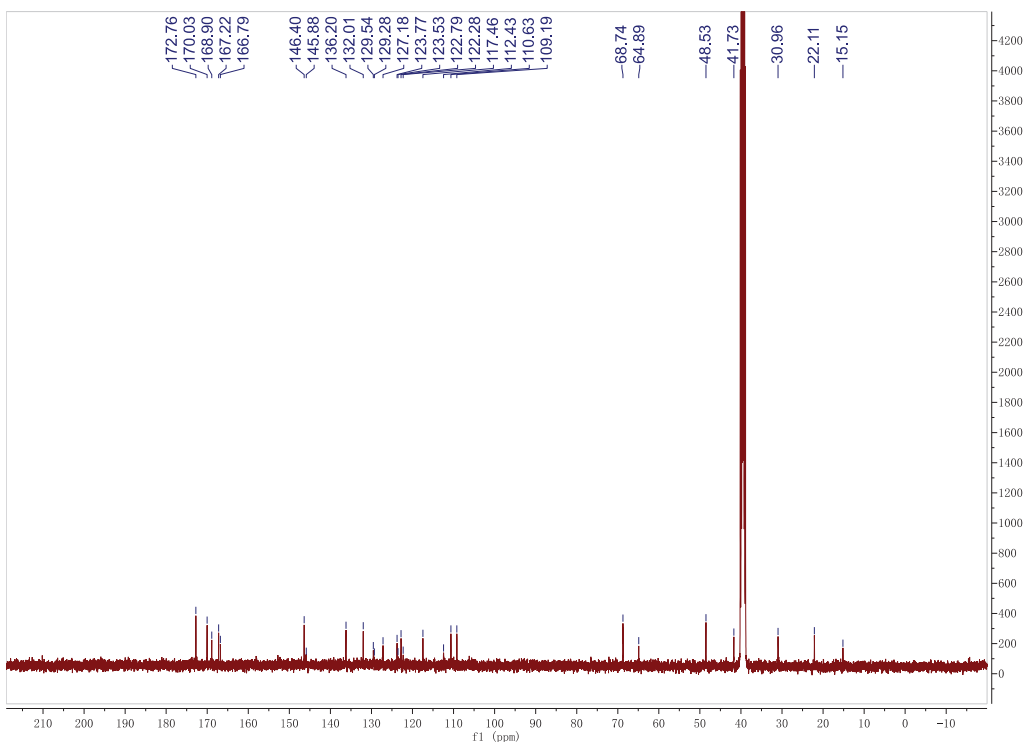

*N*-(2-(2-(2-((2,6-dioxopiperidin-3-yl)-1,3-dioxoisindolin-4-yl)amino)ethoxy)ethoxy)ethyl)-8-hydroxyquinoline-5-carboxamide (**2**)

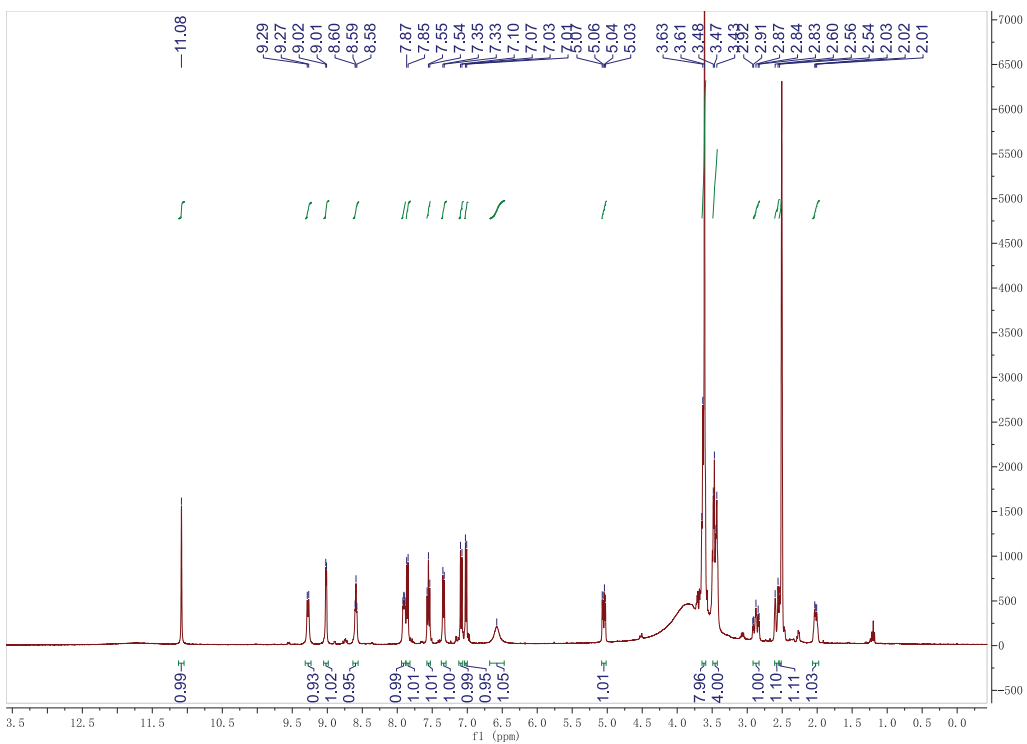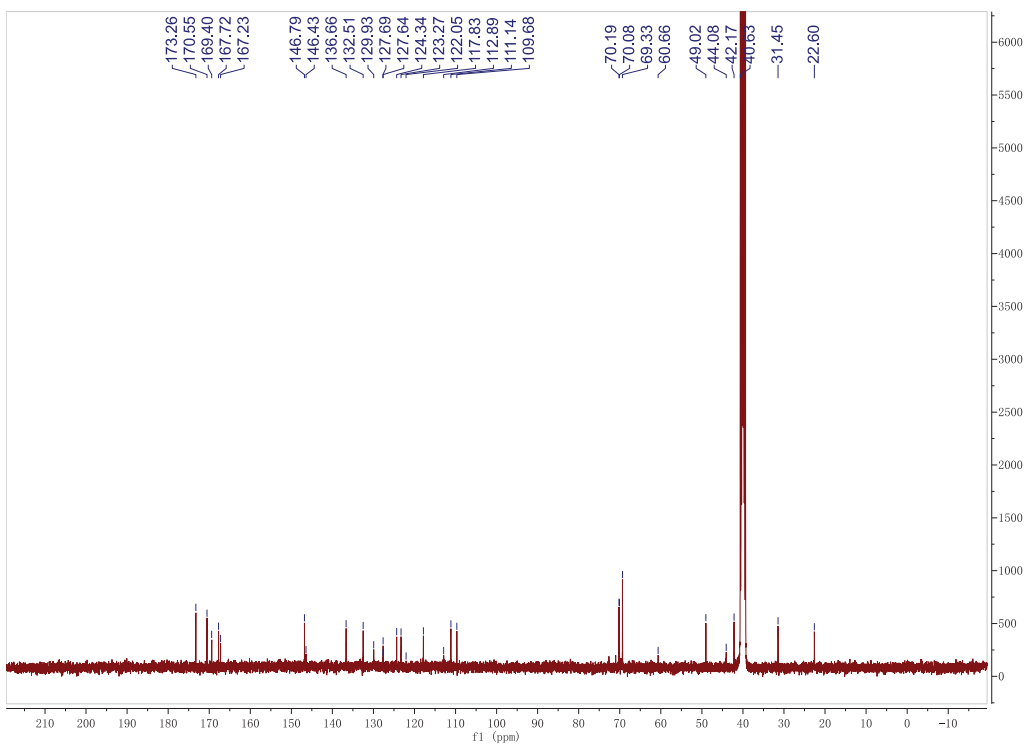

*N*-(2-(2-(2-(2-((2-(2,6-dioxopiperidin-3-yl)-1,3-dioxoisindolin-4-yl)amino)ethoxy)ethoxy)ethoxy)ethyl)-8-hydroxyquinoline-5-carboxamide (**3**):

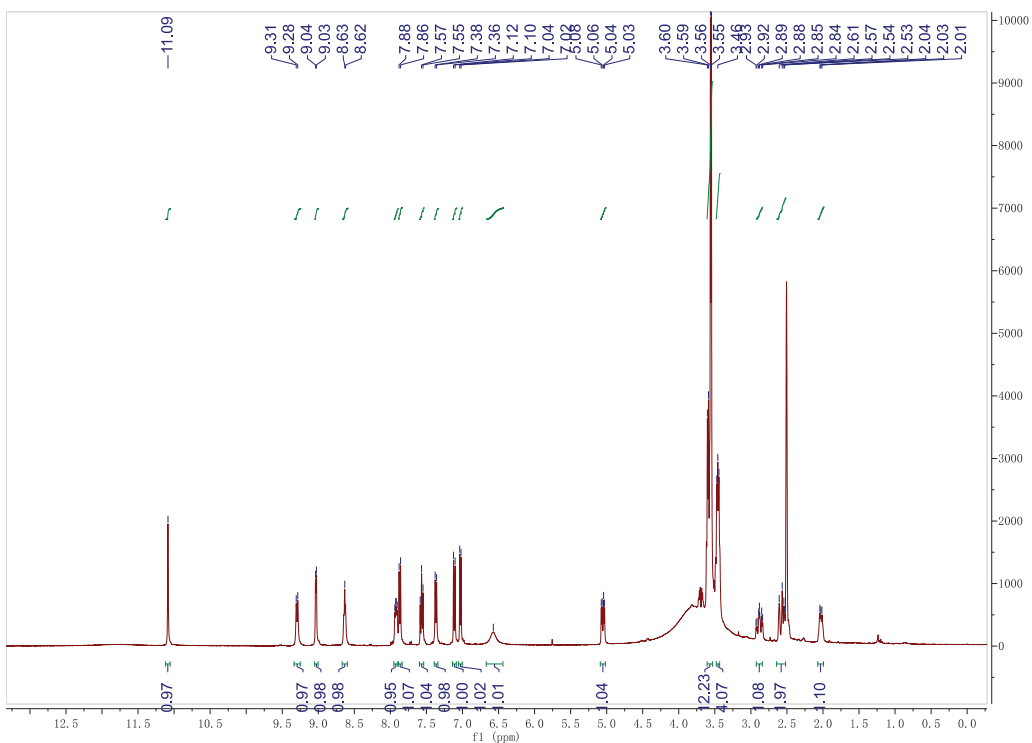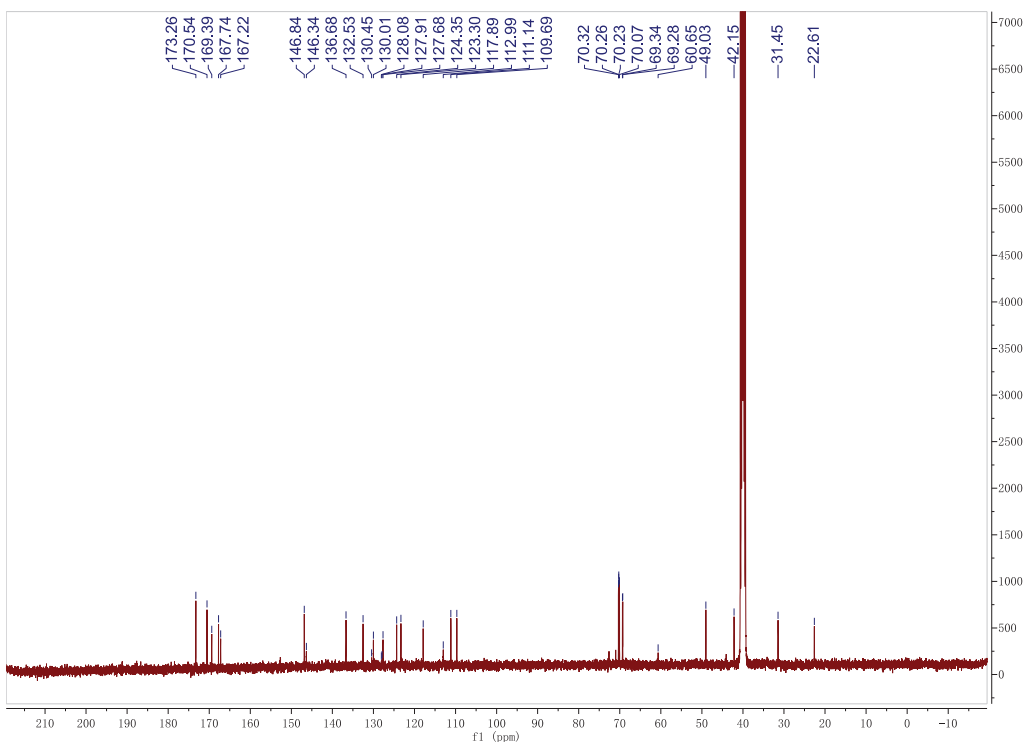

*N*-(14-((2-(2,6-dioxopiperidin-3-yl)-1,3-dioxoisindolin-4-yl)amino)-3,6,9,12-tetraoxatetradecyl)-8-hydroxyquinoline-5-carboxamide (**4**)

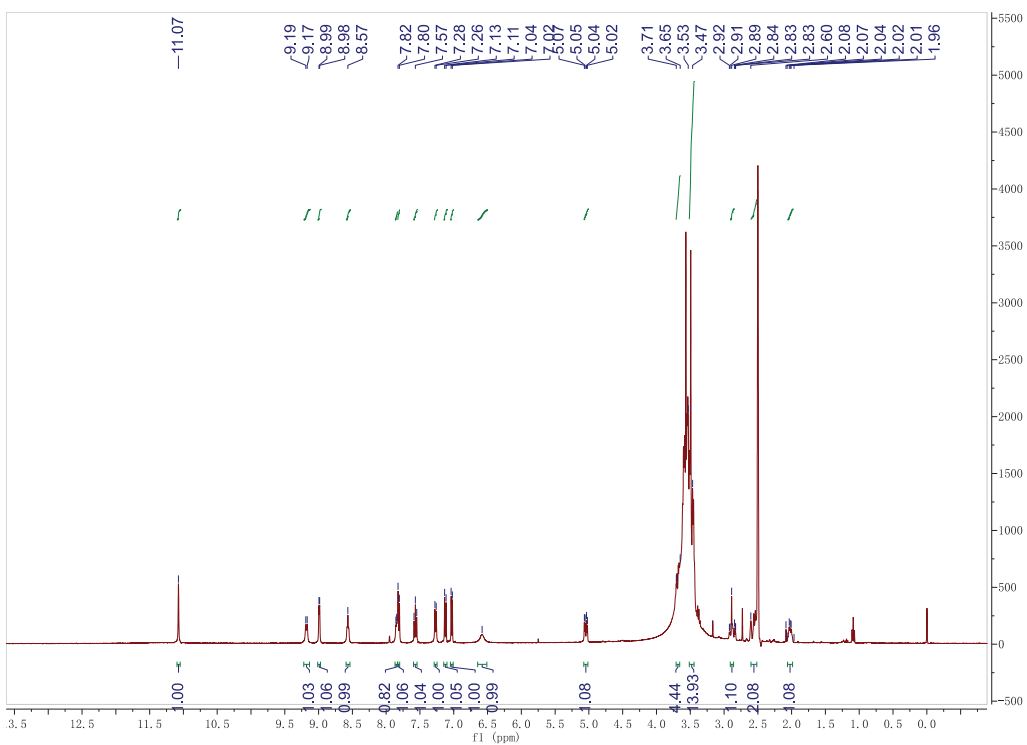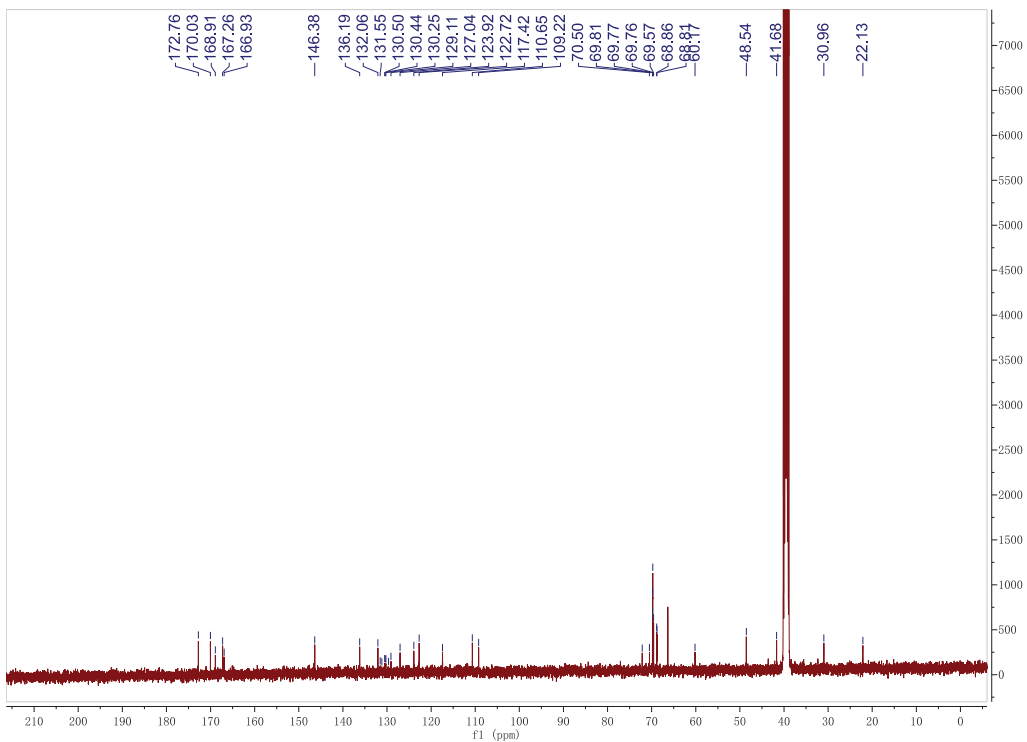

*N*-(17-((2-(2,6-dioxopiperidin-3-yl)-1,3-dioxoisindolin-4-yl)amino)-3,6,9,12,15-pentaoxaheptadecyl)-8-hydroxyquinoline-5-carboxamide (**5**)

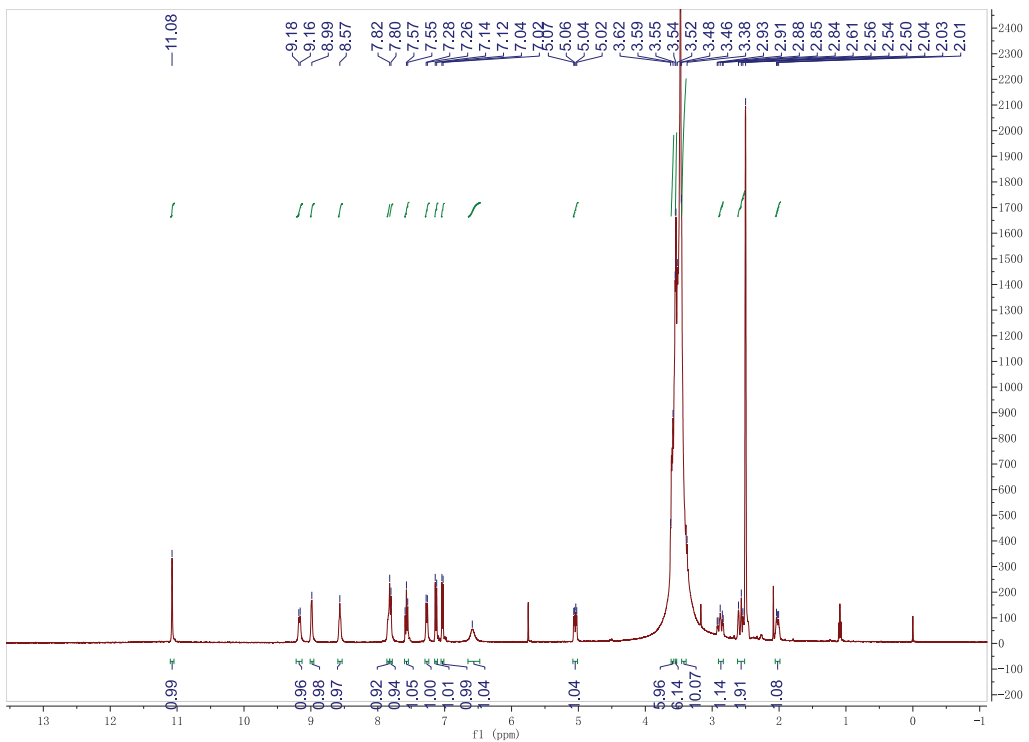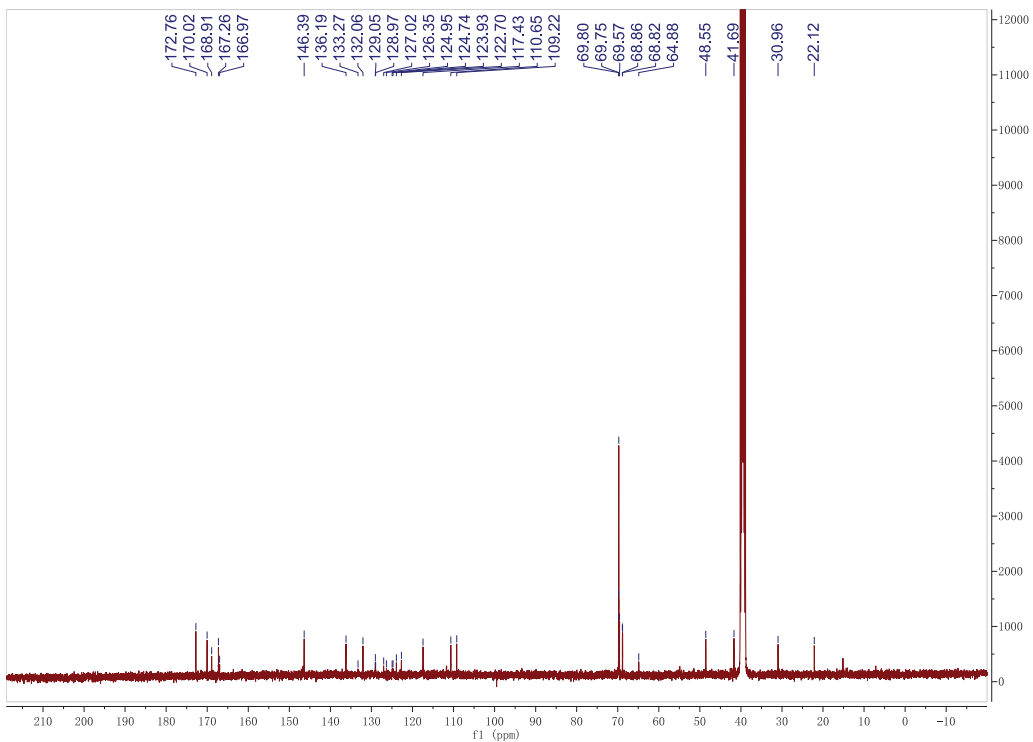

***N*-((20-((2-(2,6-dioxopiperidin-3-yl)-1,3-dioxoisindolin-4-yl)amino)-3,6,9,12,15,18-hexaoxaicosyl)-8-hydroxyquinoline-5-carboxamide (**6**))**

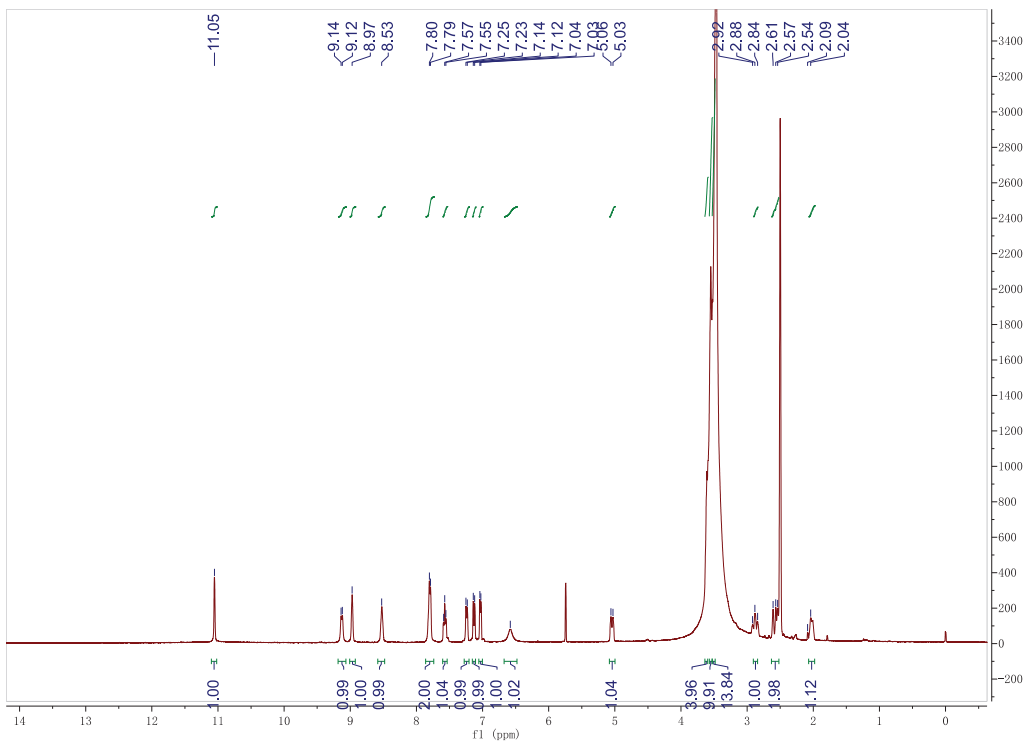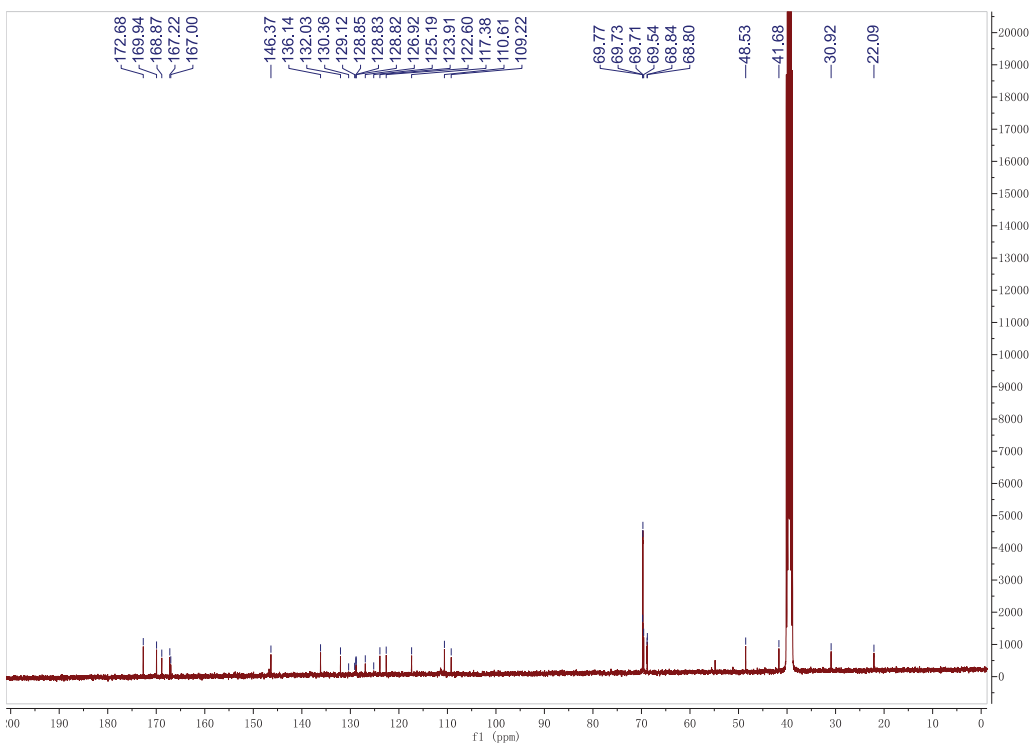

*N*-(23-((2-(2,6-dioxopiperidin-3-yl)-1,3-dioxoisindolin-4-yl)amino)-3,6,9,12,15,18,21-heptaotricosyl)-8-hydroxyquinoline-5-carboxamide (**7**)

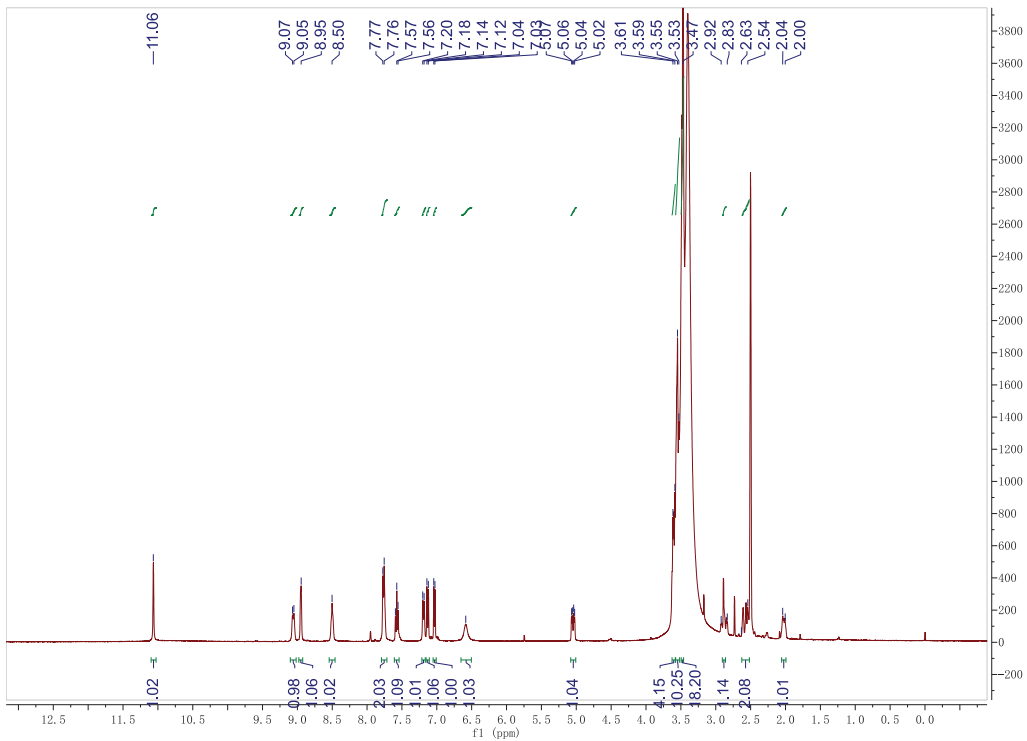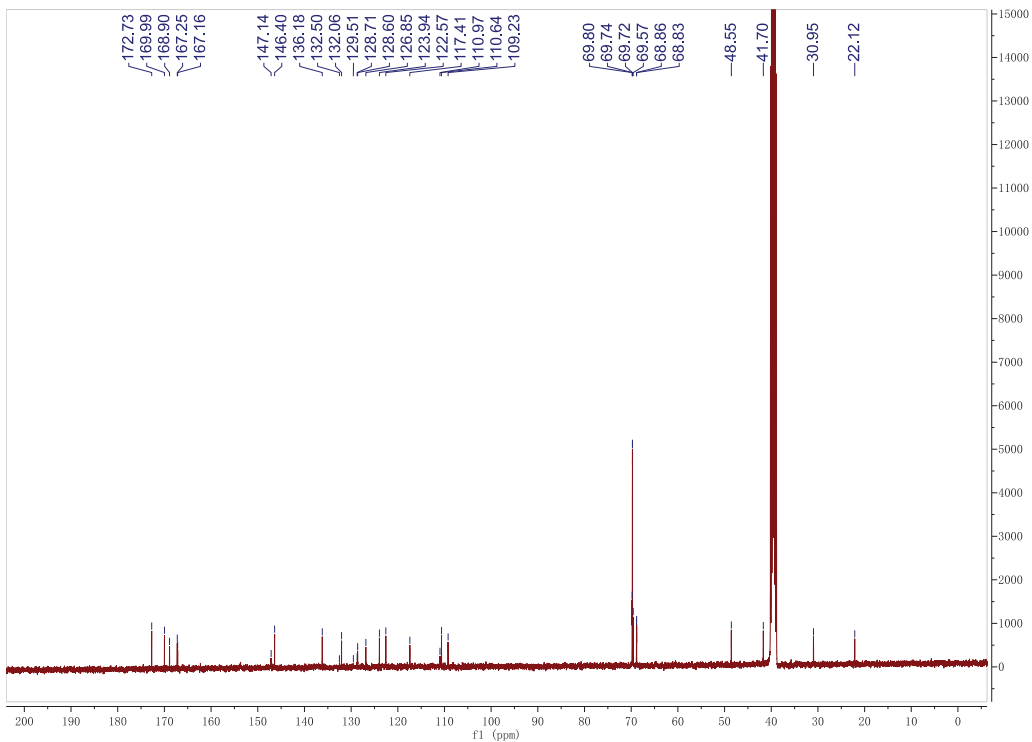



### Purity data of final compounds.

HPLC System: Varian Prostar 210;  
Column: Microsorb-MV100-5 C18 (250 \* 4.6 mm);  
Injection Volume: 5 µL;  
Sample Concentration: 1mg/mL;  
Single Wavelength: 210 nm

**Table S2.** HPLC Analysis of Target Compounds.

| Compound | System                                                                               | Retention Time (min) | Purity (%) |
|----------|--------------------------------------------------------------------------------------|----------------------|------------|
| 1        | water/acetonitrile (30/70) with 0.1% trifluoroacetic acid at 1 mL/min for 15 minutes | 3.55                 | 99.71      |
| 2        | water/acetonitrile (30/70) with 0.1% trifluoroacetic acid at 1 mL/min for 15 minutes | 3.59                 | 99.17      |
| 3        | water/acetonitrile (30/70) with 0.1% trifluoroacetic acid at 1 mL/min for 15 minutes | 3.63                 | 98.01      |
| 4        | water/acetonitrile (30/70) with 0.1% trifluoroacetic acid at 1 mL/min for 15 minutes | 3.70                 | 96.51      |
| 5        | water/acetonitrile (30/70) with 0.1% trifluoroacetic acid at 1 mL/min for 15 minutes | 3.76                 | 99.55      |
| 6        | water/acetonitrile (30/70) with 0.1% trifluoroacetic acid at 1 mL/min for 15 minutes | 3.88                 | 99.18      |
| 7        | water/acetonitrile (30/70) with 0.1% trifluoroacetic acid at 1 mL/min for 15 minutes | 3.92                 | 99.85      |

## HPLC of Compound 1

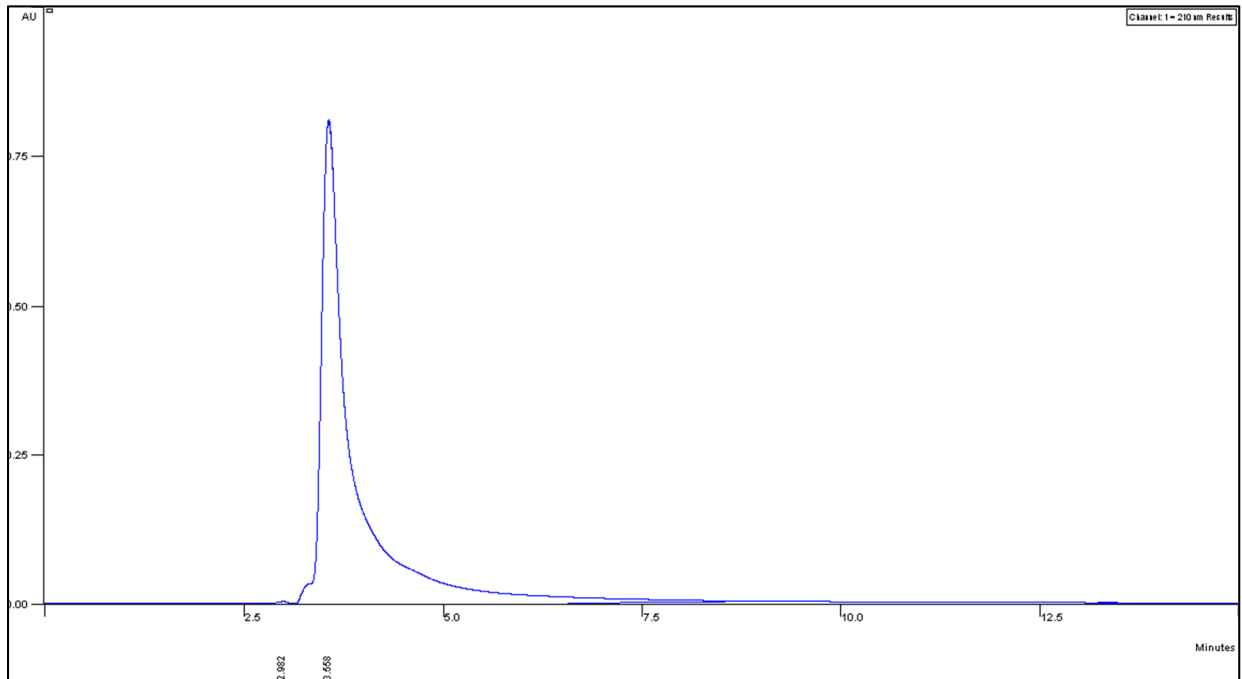

## HPLC of Compound 2

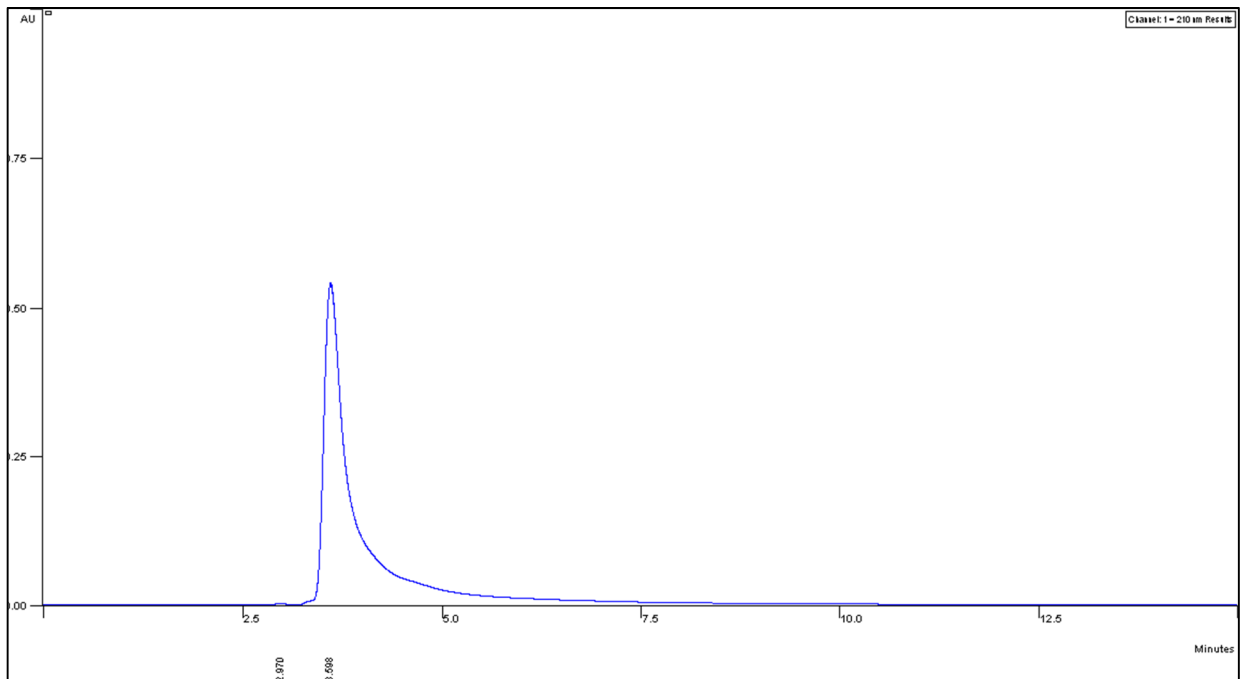

### HPLC of Compound 3

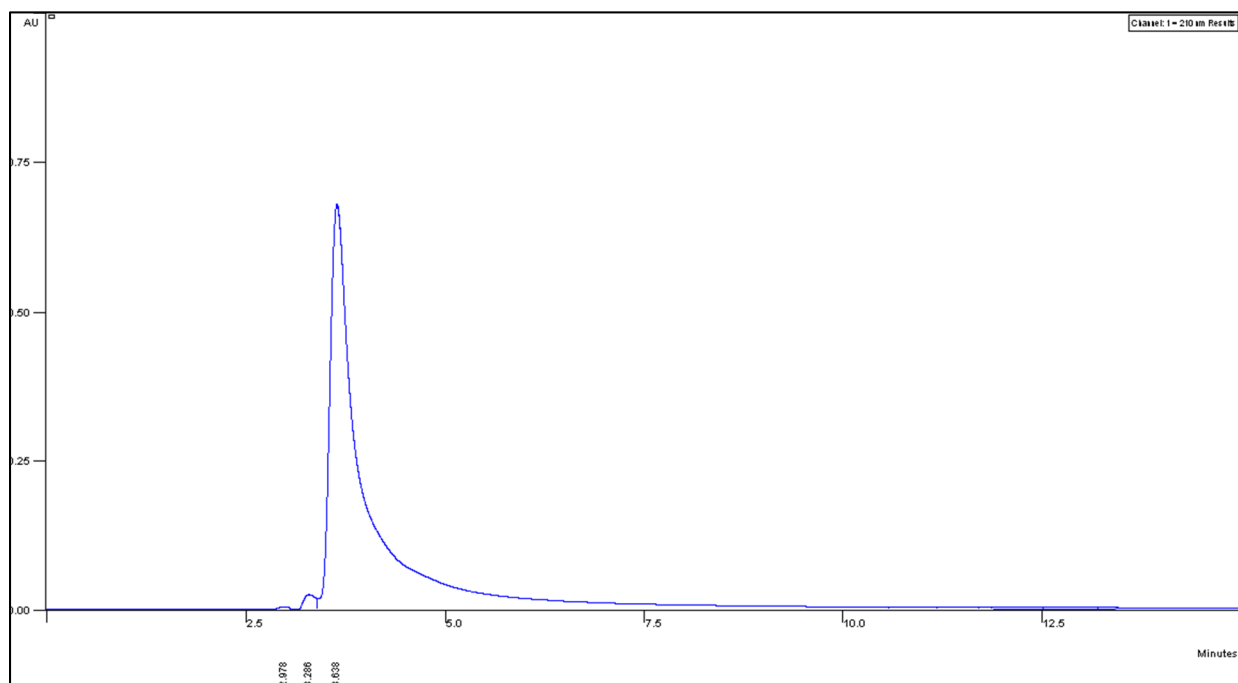

### N HPLC of Compound 4

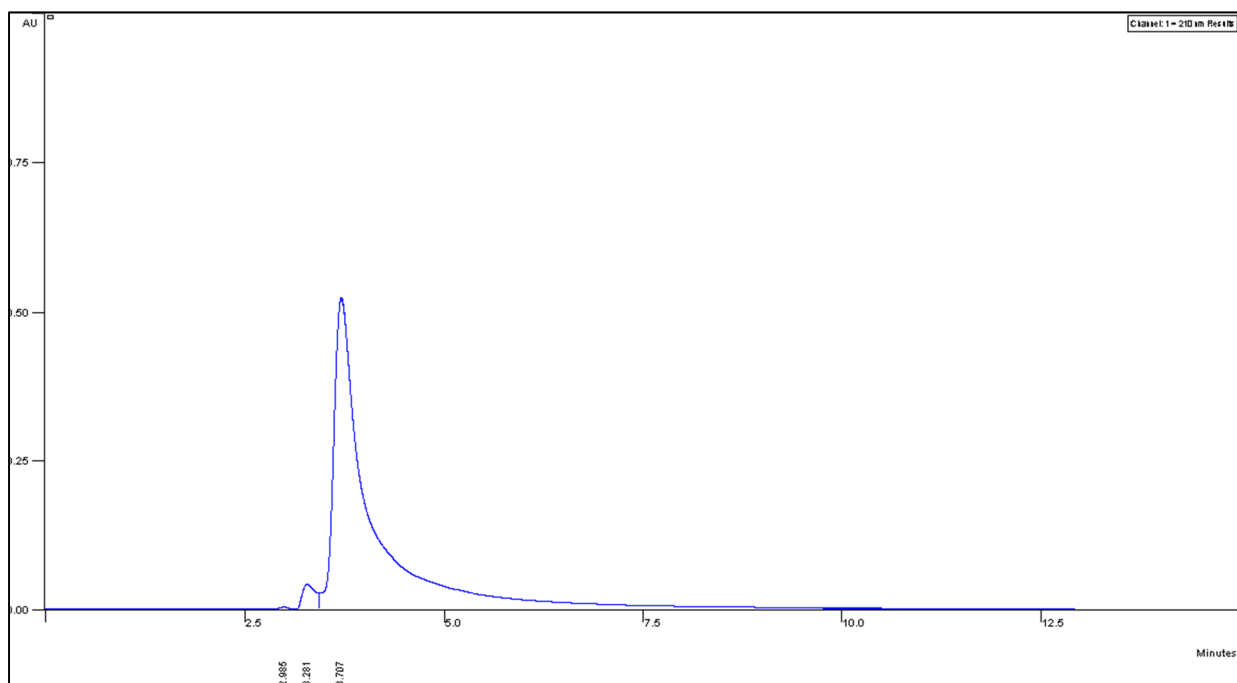

## HPLC of Compound 5

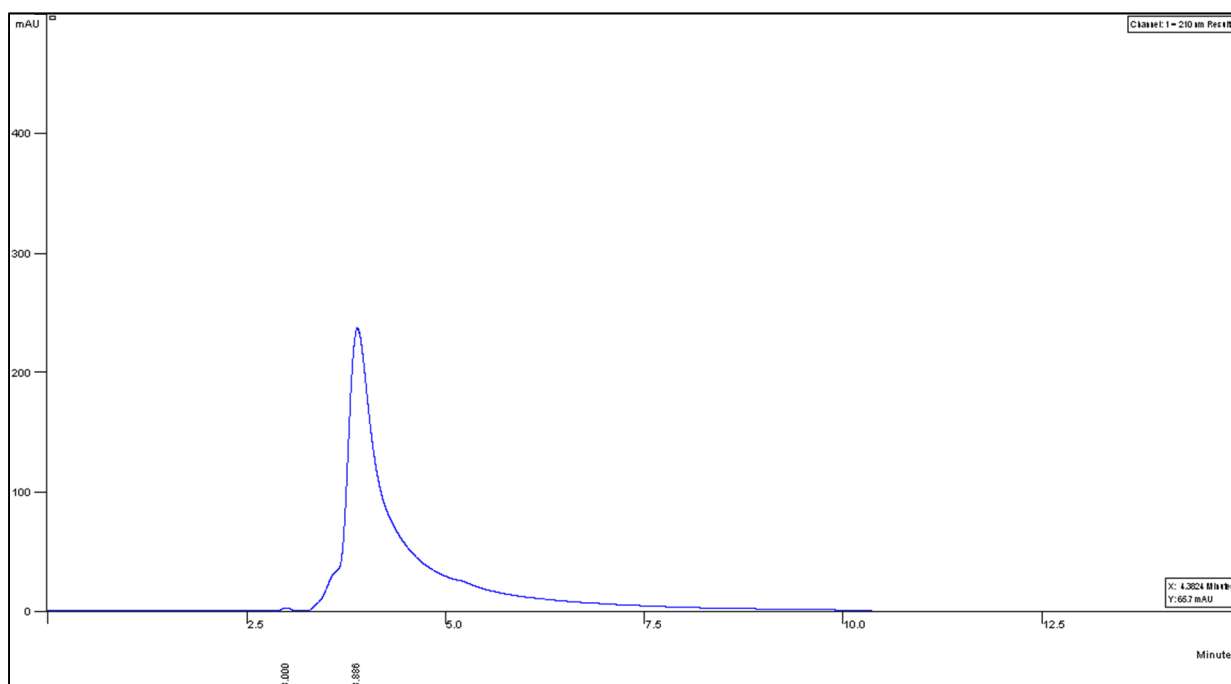

## HPLC of Compound 6

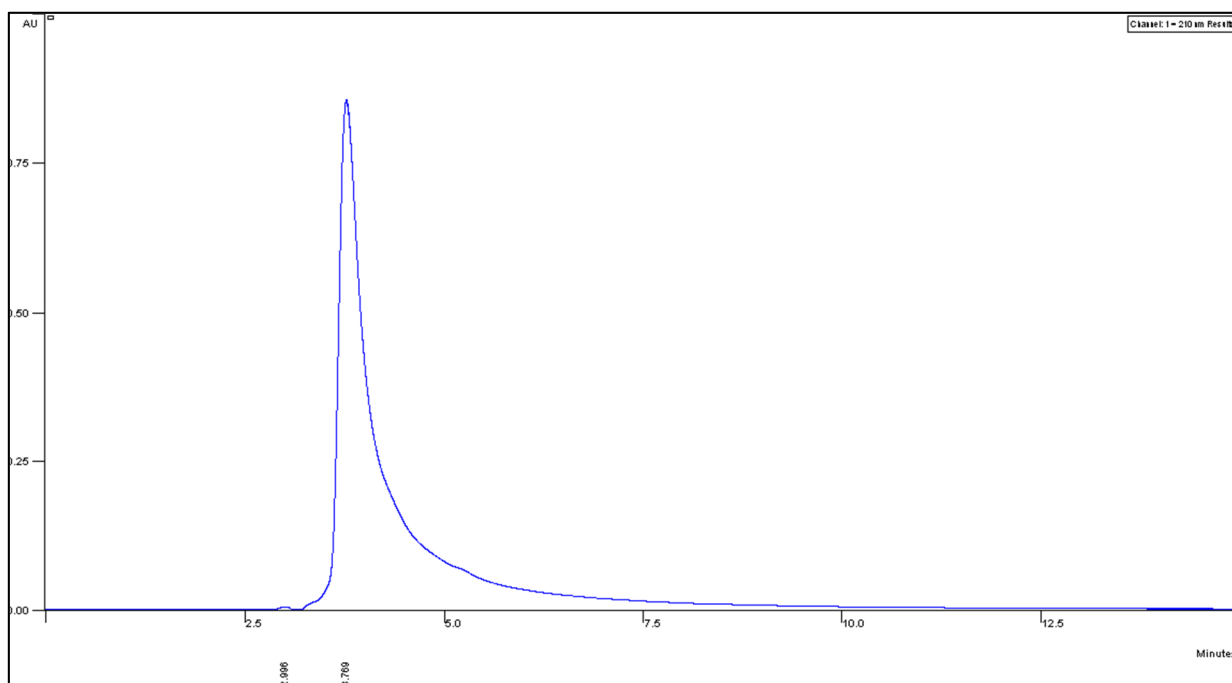

# HPLC of Compound 7

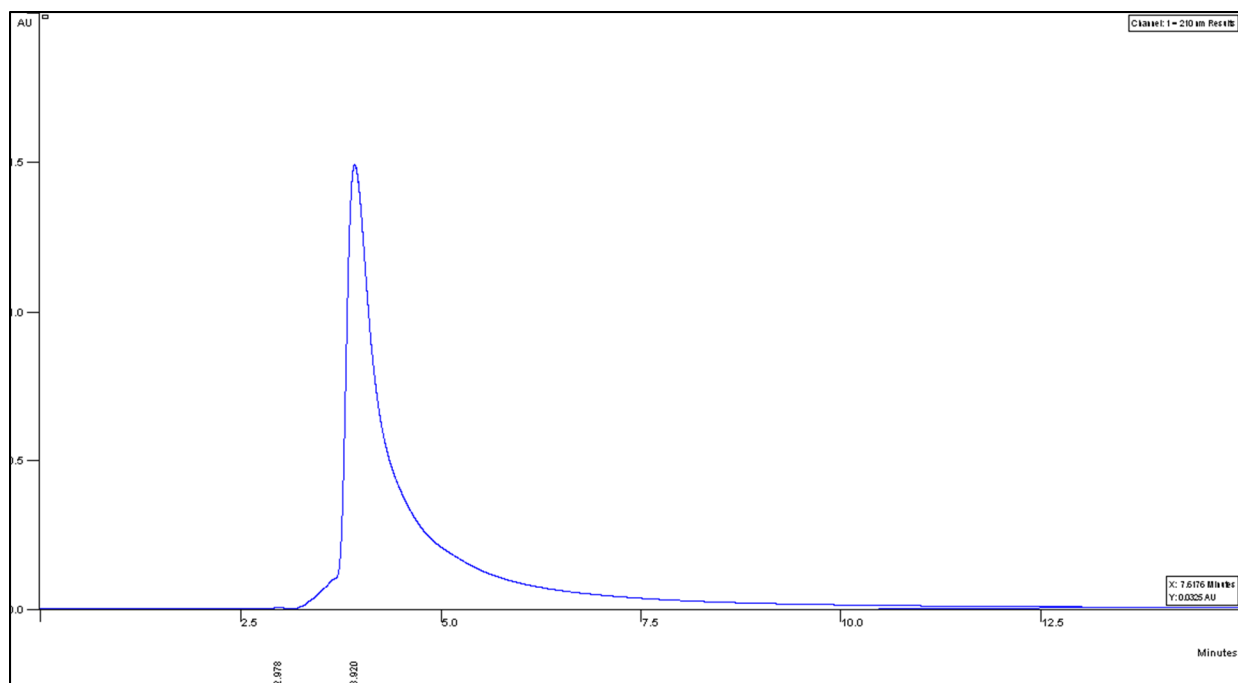

Supplement: d4md00122b1.pdf [file d4md00122b1.pdf]
